# Supplementary material
Source: PubMed Central journal article supplement (PMC3250305)
Supplement: supp_jlb.0311177_4A0311-177_Youn_suppl_figs.pdf [file supp_jlb.0311177_4A0311-177_Youn_suppl_figs.pdf]

## Supplemental Figures Legends

### Figure S1 Phenotype of Neu and G-MDSC

Casein-induced peritoneal exudates from C57BL/6 naïve mice and splenocytes from EL4 tumor bearing mice were stained with various antibodies. CD11b<sup>+</sup>Ly6G<sup>+</sup>Ly6C<sup>high</sup> cells were gated as Neu and G-MDSC. Intracellular PTX3, S100A8, S100A9 and surface GB3.1 and Ly6C were analyzed within populations of Neu and G-MDSC using flow cytometry. Typical example of three performed experiments is shown.

### Figure S2. Phenotype of Neu and MDSC

Cells isolated from indicated tissue compartments were stained with different antibodies. CD11b<sup>+</sup>Ly6G<sup>+</sup>Ly6C<sup>high</sup> cells were gated as Neu and G-MDSC. The proportion of CD244 (A) and CD115 (B) cells within that gated population was measured. Typical example of multiple experiments performed is shown. Per. Cav. – cells isolated from peritoneal exudates after mobilization with casein.

### Figure S3 The level of proteasomes and endosomes in Neu and G-MDSC

Neu from naïve mice or G-MDSC from tumor bearing mice were purified using microbeads. Cells were stained for PSMA5, or EEA1-specific antibodies (red) and counterstained with DAPI (blue). The fluorescence intensity was quantified in 50 cells per slide. Three experiments with similar results were performed. \*\* ( $p < 0.01$ ) \* ( $p < 0.05$ ) – statistically significant differences between G-MDSC and Neu. Bar = 10  $\mu$ m

### Figure S4 Changes in LAMP2 level in G-MDSC during culture

G-MDSC from splenocytes of EL4 tumor-bearing mice were cultured with GM-CSF *in vitro* for indicated time and cells were stained for LAMP2. Typical example of staining is shown (Mag x 630). Scale bar = 10  $\mu$ m.

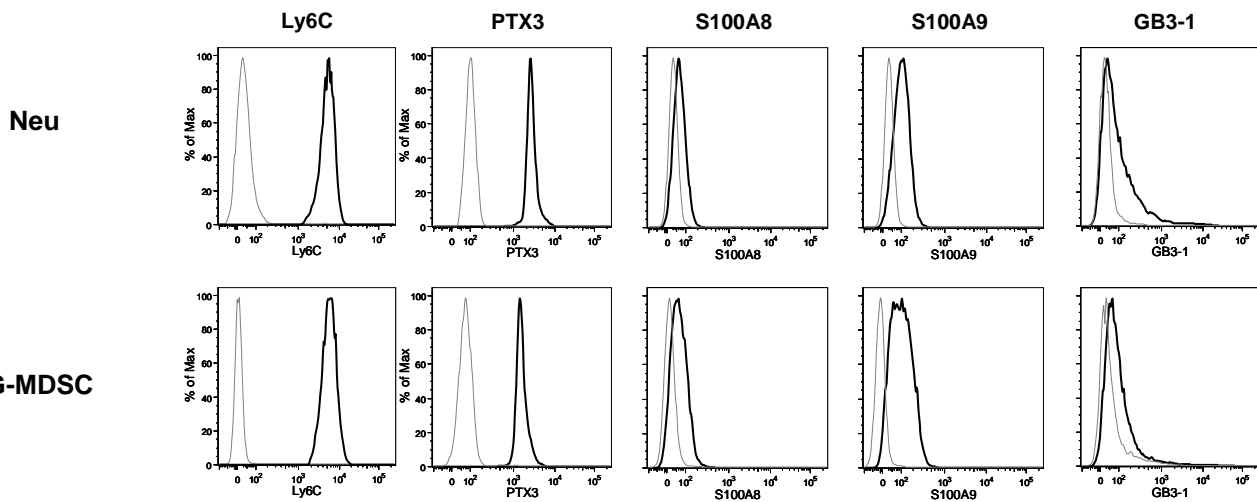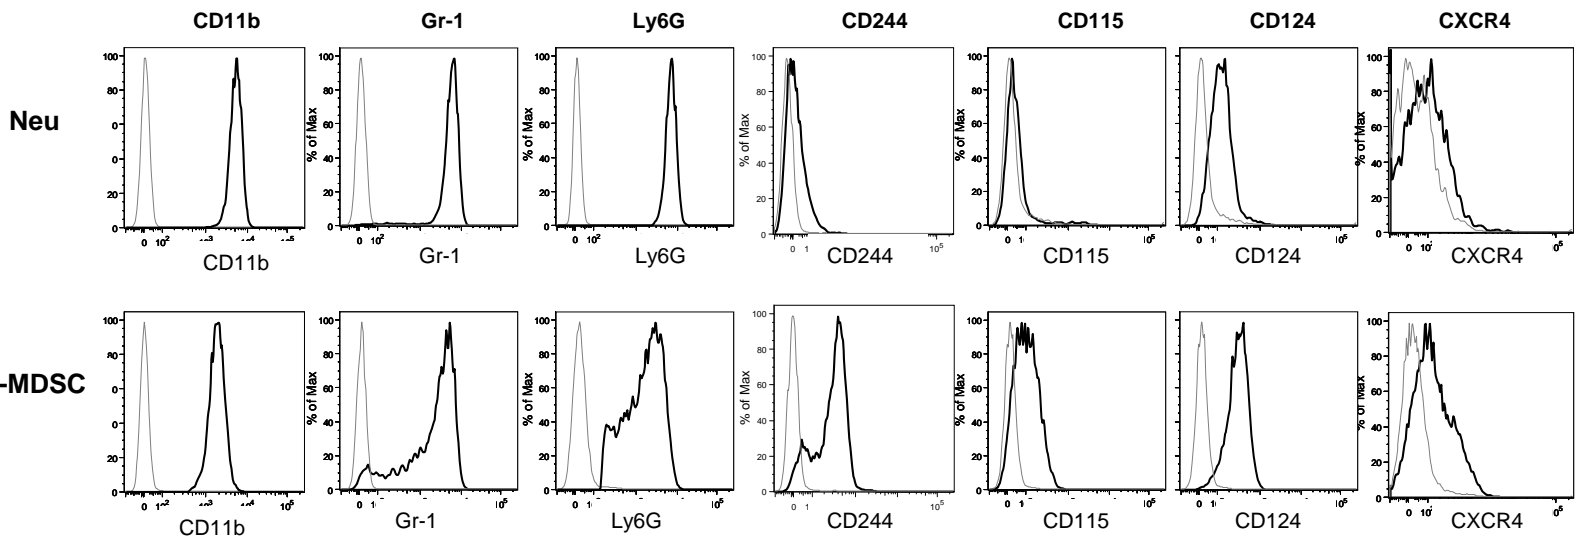

**Figure S1**

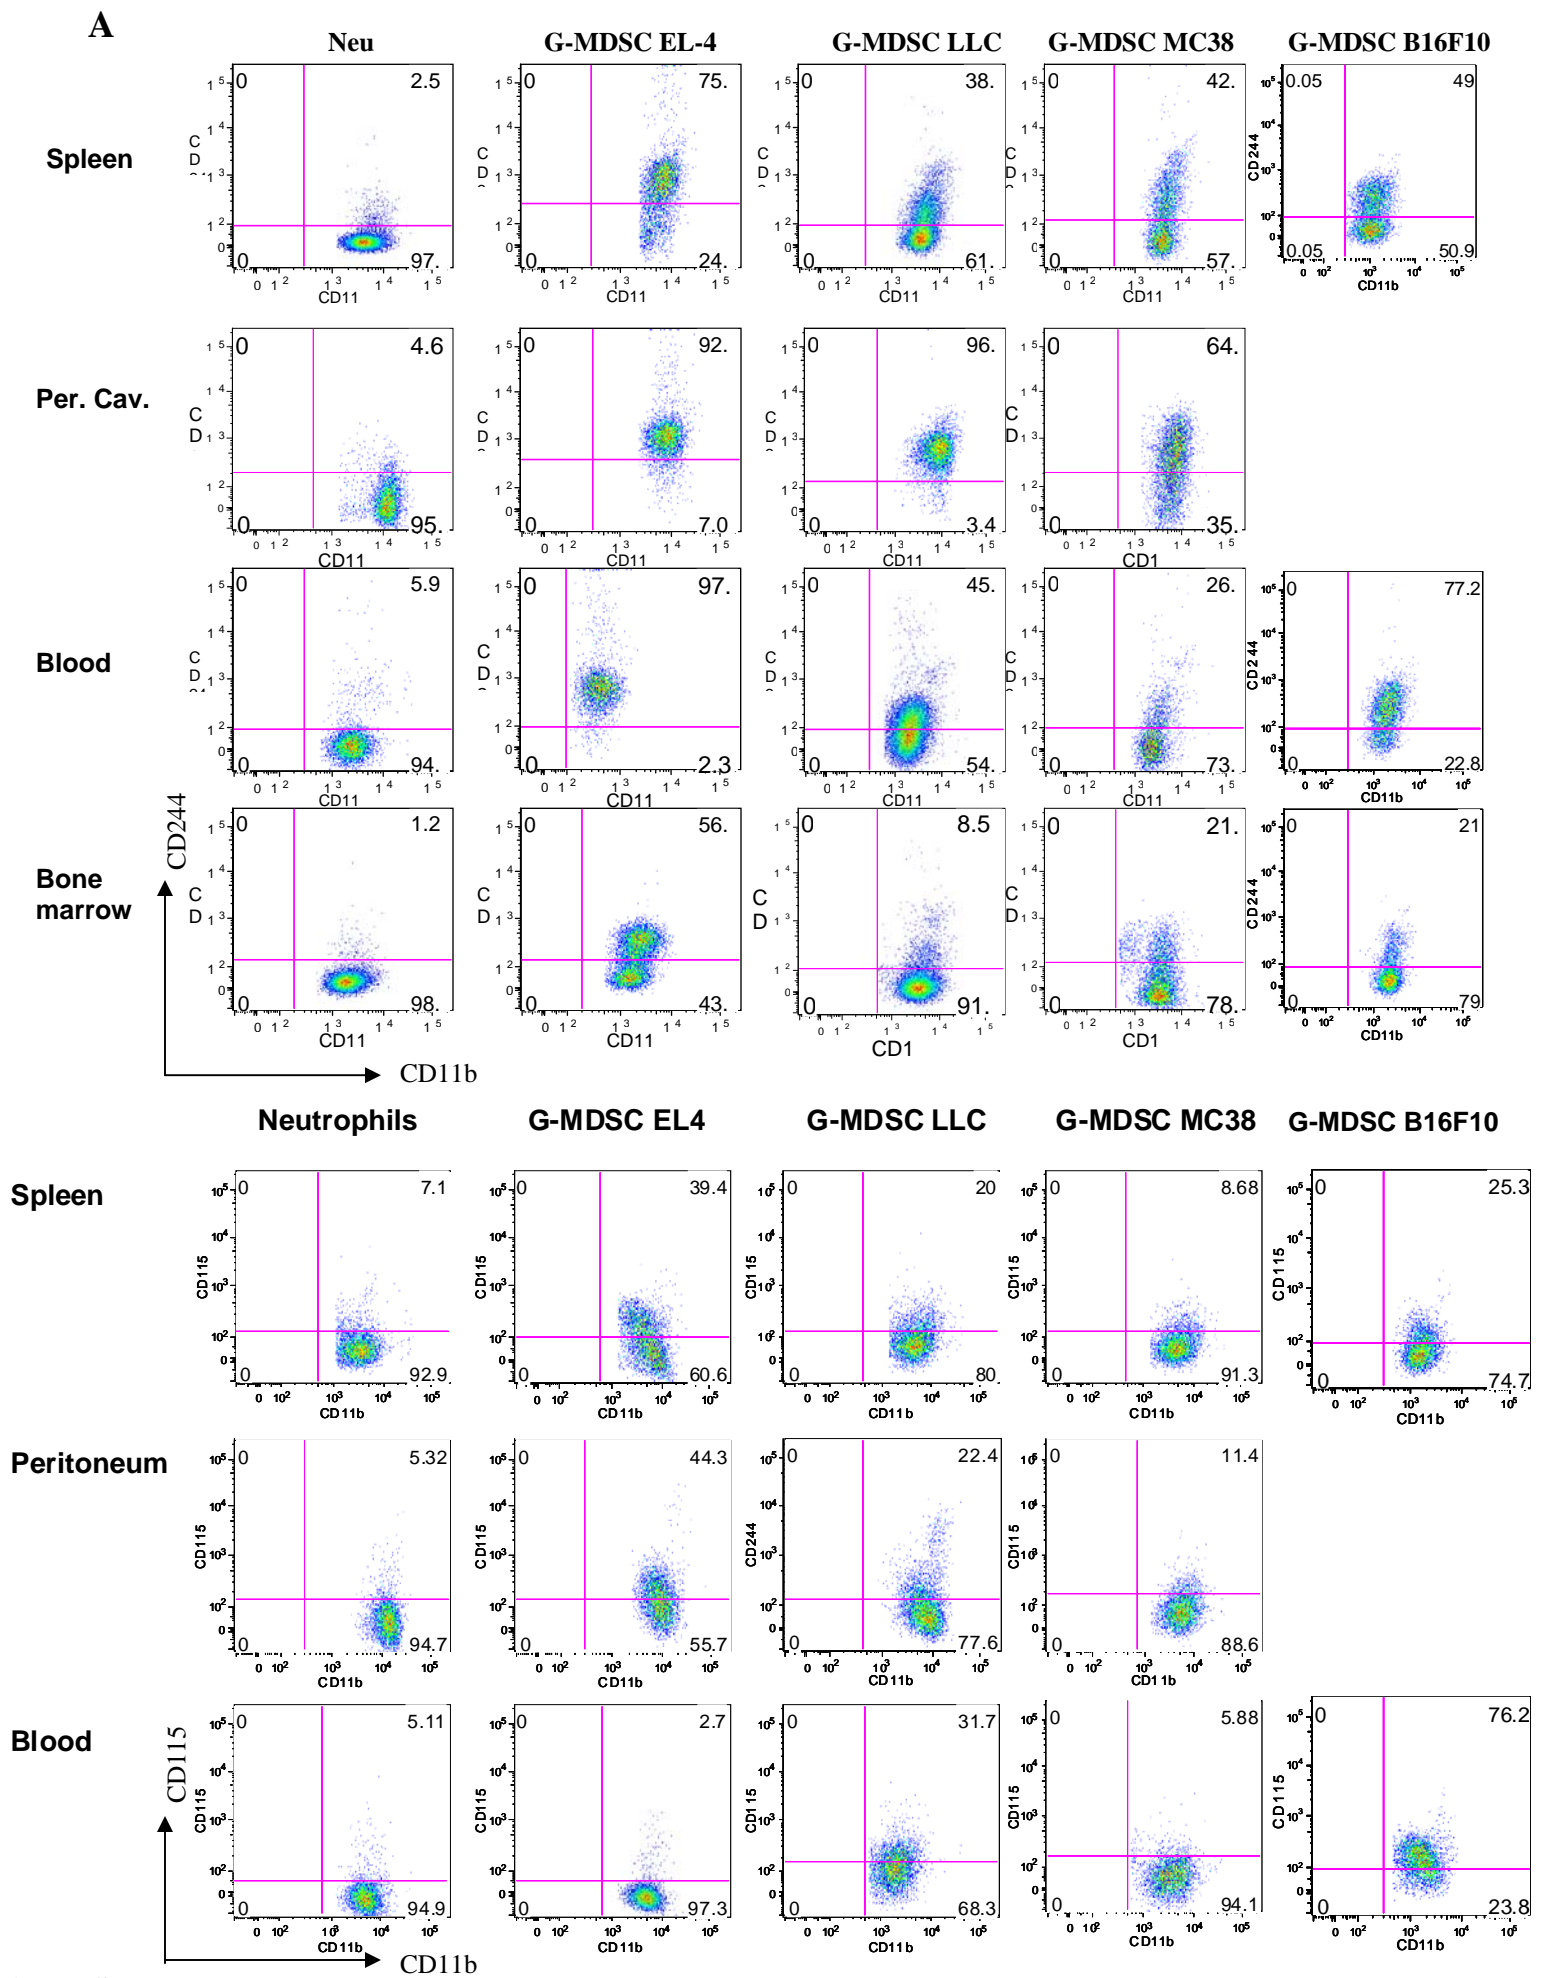

**Figure S2**

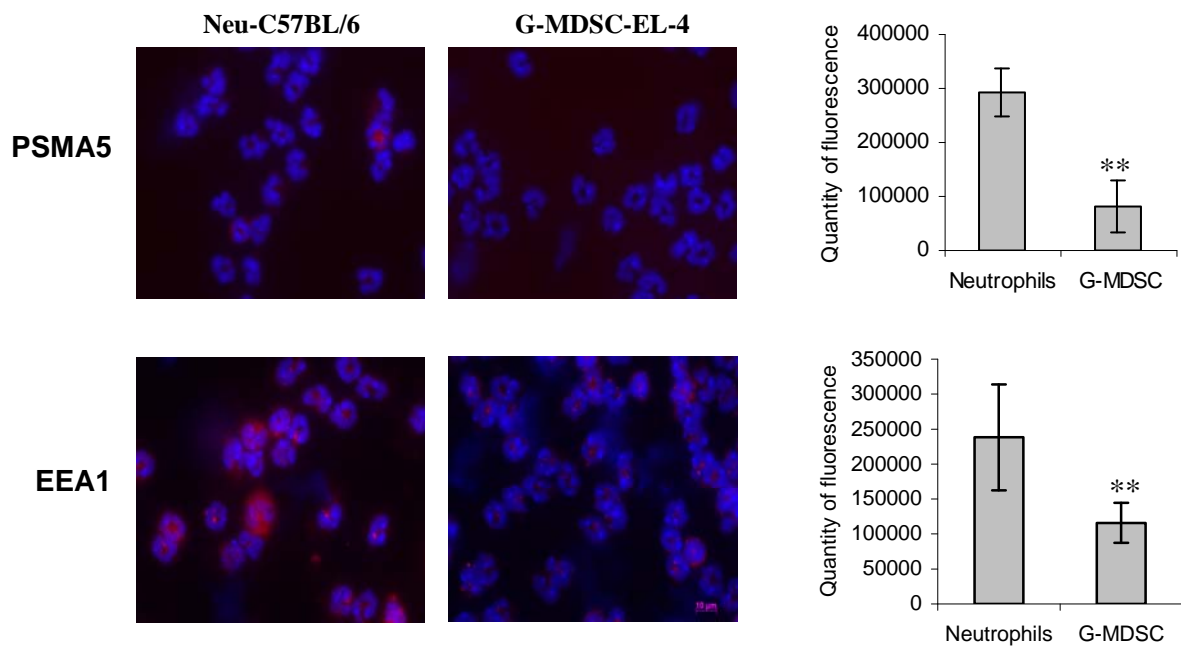

**Figure S3 The level of proteasomes and endosomes in Neu and G-MDSC**

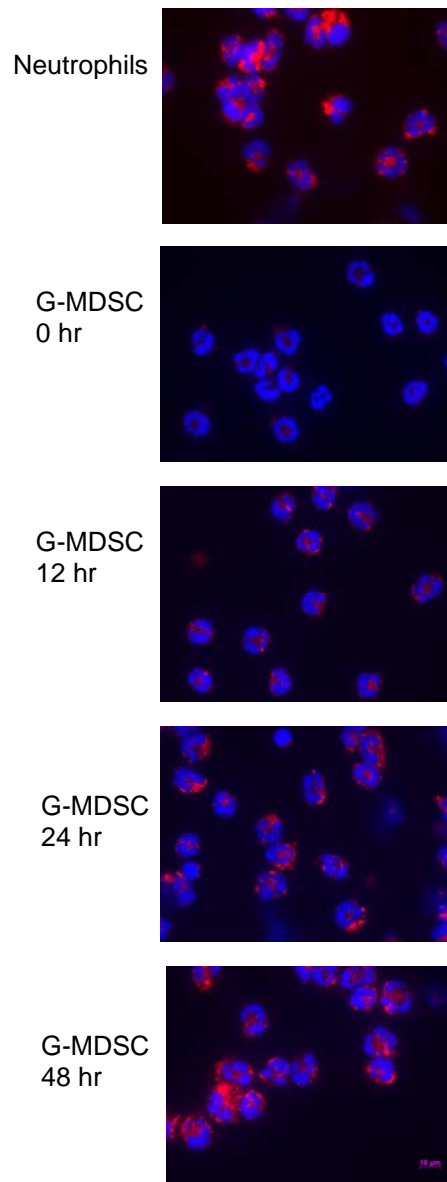

**Figure S4 Changes in LAMP2 level in G-MDSC during culture**
